# Supplementary material for: FOXE1 represses cell proliferation and Warburg effect by inhibiting HK2 in colorectal cancer
Source: PubMed Central journal article supplement (PMC6953170; doi:10.1186/s12964-019-0502-8), 2020-01-09
Supplement: 12964_2019_502_MOESM2_ESM.pdf [file 12964_2019_502_MOESM2_ESM.pdf]

**A**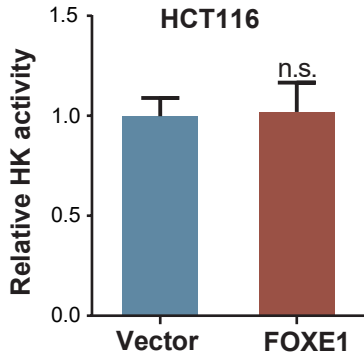**B**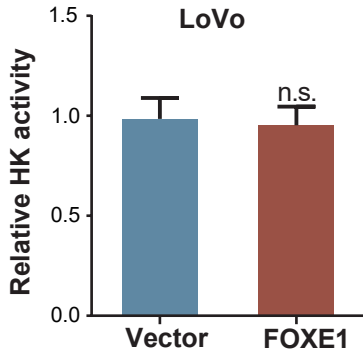**Figure S2**
